# Supplementary material
Source: PubMed Central journal article supplement (PMC3277164)
Supplement: 1107879109_pnas.201107879SI.pdf [file 1107879109_pnas.201107879SI.pdf]

# Supporting Information

Deng et al. 10.1073/pnas.1107879109

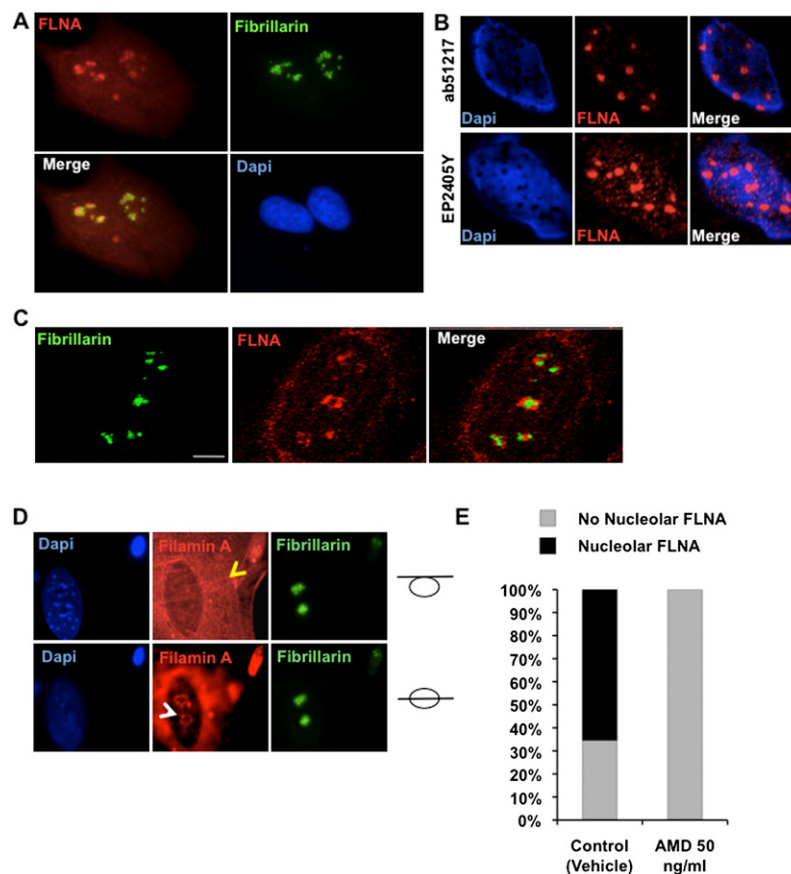

**Fig. S1.** Confocal microscopy showing filamin A (FLNA) in the nucleoli of HeLa cells and in primary cells. (A) Immunofluorescence microscopy showing colocalization of endogenous FLNA (red) and the nucleolar marker fibrillarin (green) in HeLa cells. (B) Nuclei isolated from SaOS-2 cells were stained with two different FLNA antibodies. The large discrete FLNA staining corresponds to the DAPI-deficient regions. The number and shape of the large discrete FLNA-containing bodies in each nucleus resembles the size and nuclear distribution of nucleoli. Ab51217 is a rabbit polyclonal antibody raised against a synthetic peptide around residue 2152 of human FLNA (Abcam). EP2405Y is a mouse monoclonal antibody raised against a synthetic peptide corresponding to residues in the C-terminal region of human FLNA (Abcam). (C) Immunofluorescence confocal microscopy showing colocalization of endogenous FLNA (red) and the nucleolar marker fibrillarin (green) in isolated nucleoli of SaOS-2 cells. (D) Immunofluorescence microscopy showing colocalization of endogenous FLNA (red) and the nucleolar marker fibrillarin (green) in primary mouse bone marrow stromal cells. (Upper) Apical section revealing the intense fibrillar staining of FLNA throughout the cell (yellow arrow). (Lower) Equatorial image of the same cell demonstrating that FLNA (white arrow) colocalizes with fibrillarin. (E) Graph showing the percentage of SaOS-2 cells containing nucleolar FLNA in the presence and absence of actinomycin D (AMD).

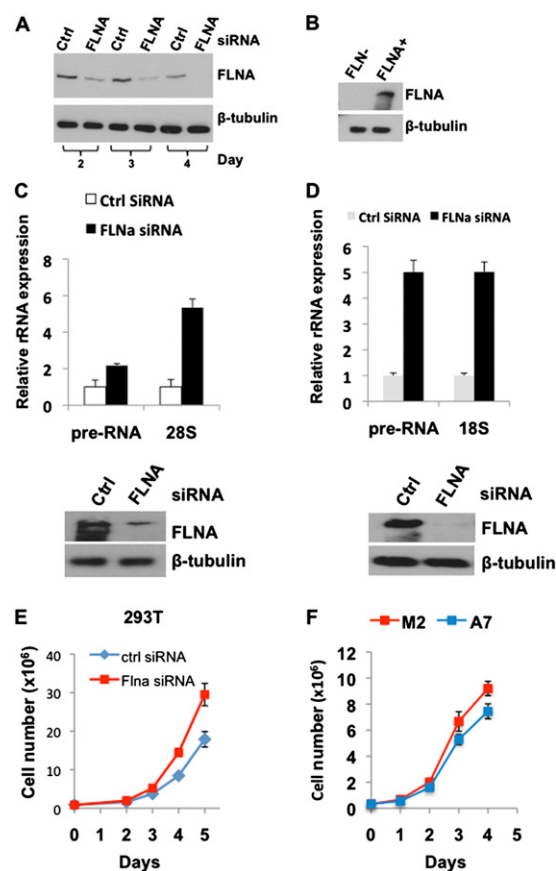

**Fig. S2.** Stable expression of FLNA shRNAs increases rRNA expression. (A) siRNA knockdown of FLNA. Immunoblots show the reduced expression of FLNA after transfection with FLNA siRNAs in SaOS-2 cells. (B) Immunoblot showing FLNA expression in M2 (FLNA<sup>-</sup>) and A7 (FLNA<sup>+</sup>) cells. (C) Quantitative RT-PCR (qRT-PCR) showing increased rRNA expression in SaOS-2 stably expressing FLNA shRNAs after lentivirus transduction. (D) qRT-PCR showing increased rRNA expression in 293T cells stably expressing FLNA shRNAs after lentivirus transduction. (Lower) Immunoblots of FLNA expression. (E and F) FLNA deficiency results in increased cell proliferation. 293T cells, stably expressing FLNA shRNAs (E) and M2 cells (F), proliferate at a faster rate than their FLNA-expressing counterparts do.
